# Supplementary material
Source: PubMed Central journal article supplement (PMC6221947)
Supplement: NIHMS1503062-supplement-1.pdf [file NIHMS1503062-supplement-1.pdf]

**Structure, Volume 26**

**Supplemental Information**

**Trypanosomatid Deoxyhypusine Synthase Activity  
Is Dependent on Shared Active-Site Complementation  
between Pseudoenzyme Paralogs**

**Gustavo A. Afanador, Diana R. Tomchick, and Margaret A. Phillips**

**Table S1. Role of active site residues, based on published mutational and structural analysis on hDHS (related to Figure 7).**

| <b>TbDHSc:DHSp</b>           | <b>hDHS</b>                                      | <b>Role and/or mutation effect</b>                                                                                                              |
|------------------------------|--------------------------------------------------|-------------------------------------------------------------------------------------------------------------------------------------------------|
| H377A-DHSc:DHSp <sup>^</sup> | H288-hDHS(Lee et al., 2001, Liao et al., 1998)   | Proposed hydride acceptor in (Step 1, Fig. 2)                                                                                                   |
| DHSc:DHSp-H266A <sup>^</sup> |                                                  |                                                                                                                                                 |
| DHSc:DHSp-E103A <sup>#</sup> | E136-hDHS(Umland et al., 2004)                   | Required for binding of spermidine based on GC7 structure                                                                                       |
| E166A-DHSc:DHSp <sup>#</sup> |                                                  |                                                                                                                                                 |
| D405A-DHSc:DHSp              | D316-hDHS(Umland et al., 2004, Lee et al., 2001) | Required for spermidine binding; H-bond with amino group in GC7; possible catalytic base? (Step 2, Fig. 2)                                      |
| DHSc:DHSp-E104A              | E137-hDHS(Umland et al., 2004, Lee et al., 2001) | Required for spermidine binding; mutants are unable to bind spermidine or catalyze spermidine cleavage (Step 2, Fig. 2); NAD binding unaffected |
| DHSc:DHSp-D218A              | D243-hDHS(Umland et al., 2004, Lee et al., 2001) | Prevents spermidine cleavage (Step 2, Fig. 2) due to lack of spermidine binding; NAD binding unaffected                                         |

**Table S2. Thermal stability of *Tb*DHSc:DHSp WT and mutants** (Related to Figure 7). The melting temperature ( $T_m$ ) of each enzyme was measured using a Thermal Shift Assay. All enzymes showed good thermal stability with  $T_m$  above 51°C. Errors represent standard deviation for 6 replicates.

| <b>Sample</b>       | <b><math>T_m</math> (°C)</b> |
|---------------------|------------------------------|
| <i>Tb</i> DHSc:DHSp | 56.0 ± 0.45                  |
| E166A-DHSc:DHSp     | 51.1 ± 0.66                  |
| DHSc:DHSp-E103A     | 56.1 ± 0.20                  |
| DHSc:DHSp-E104A     | 57.2 ± 0.61                  |
| DHSc:DHSp-D218A     | 57.6 ± 0.58                  |
| D405A-DHSc:DHSp     | 55.5 ± 0.84                  |
| DHSc:DHSp-H266A     | 57.4 ± 1.39                  |
| H377A-DHSc:DHSp     | 55.7 ± 0.41                  |
